# Supplementary material for: Nuclear transporter Importin-13 plays a key role in the oxidative stress transcriptional response
Source: PubMed Central journal article supplement (PMC8501021; doi:10.1038/s41467-021-26125-x), 2021-10-08
Supplement: 41467_2021_26125_MOESM1_ESM.pdf [file 41467_2021_26125_MOESM1_ESM.pdf]

## **Supplementary Information**

**Nuclear transporter Importin-13 plays a key role in the oxidative stress transcriptional response**

**Gajewska, K. A, Lescesen, H, Ramialison, M, Wagstaff, K. M, Jans, D. A.**

## Supplementary Figures

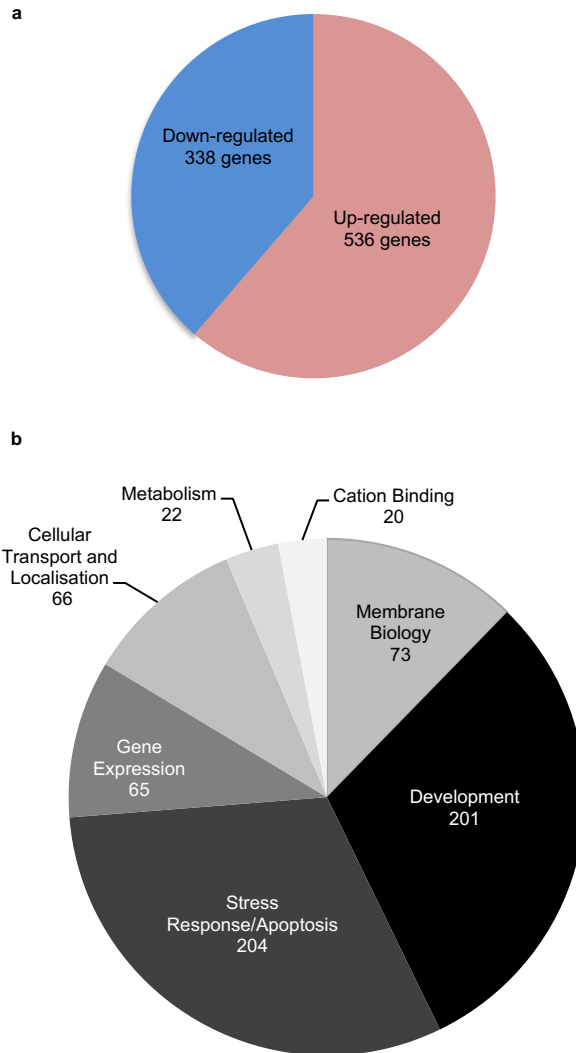

**Supplementary Figure 1. The IPO13-dependent transcriptome in ESCs.** Untreated IPO13<sup>+/+</sup> and IPO13<sup>-/-</sup> ESCs were subjected to NGS as described in the Results section. **a.** Log<sub>2</sub>-fold change in expression (FDR cut-off = 0.05) of genes in IPO13<sup>-/-</sup> compared to IPO13<sup>+/+</sup> ESCs are shown, where red and blue denote up- and down-regulated genes respectively. **b.** Gene Ontology analysis of differentially expressed genes in **a** using the Functional Annotation Tool of DAVID Bioinformatics Resources 6.8 for 651 annotated genes.

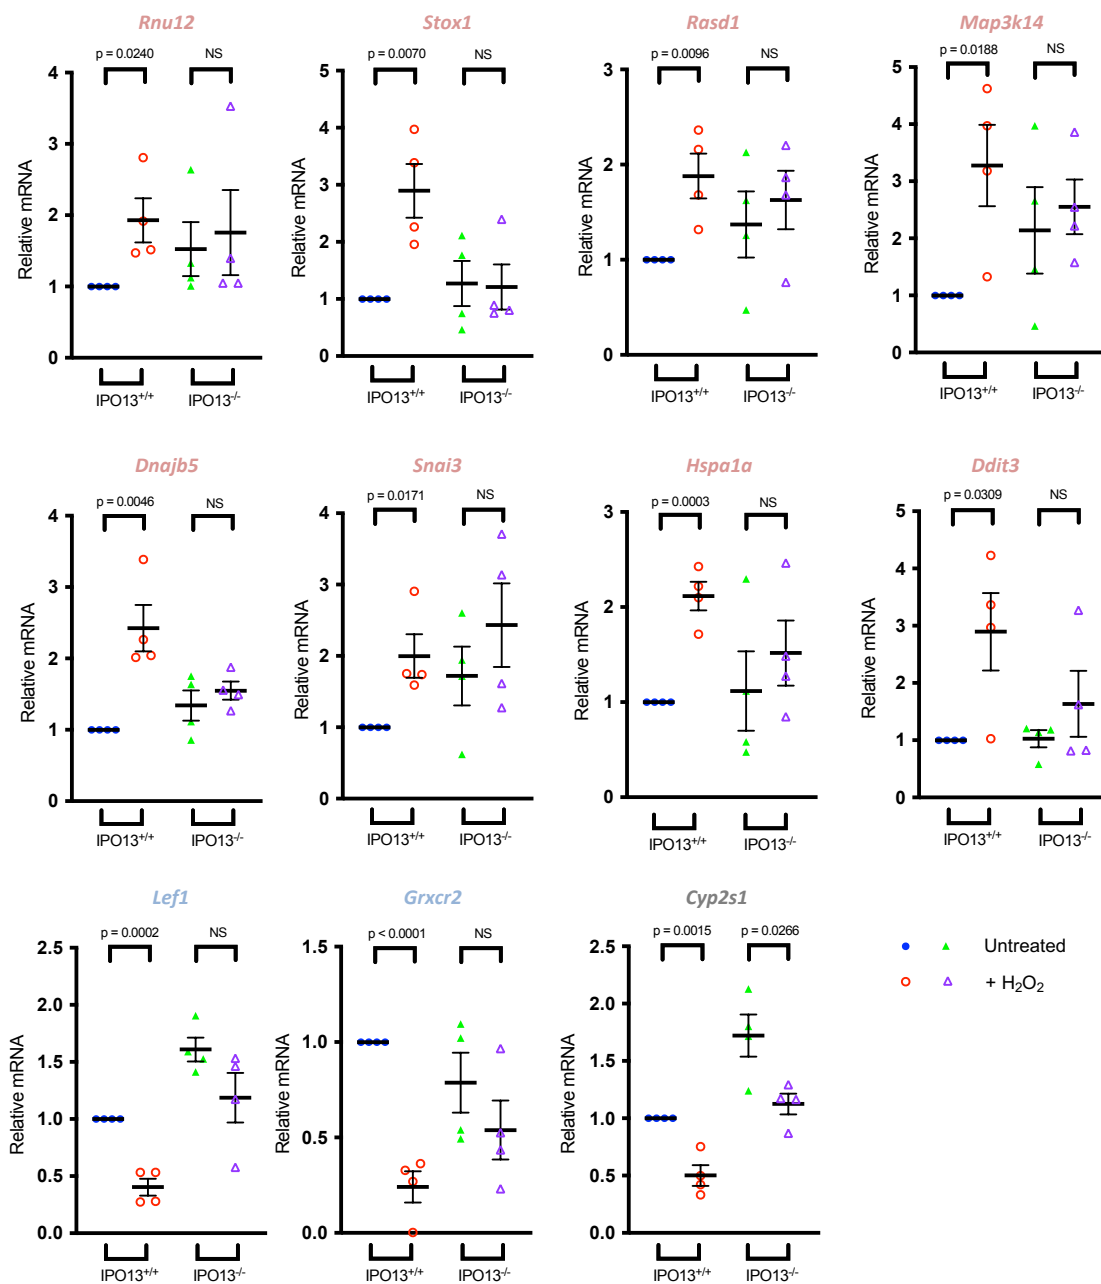

**Supplementary Figure 2. RT-qPCR validation of selected genes showing IPO13-dependent stress responses.** *IPO13*<sup>+/+</sup> and *IPO13*<sup>-/-</sup> ESCs were treated without and with 125  $\mu$ M  $H_2O_2$  for 1 h followed by 2 h recovery prior to RNA extraction. Transcript levels were assessed using SensiMix SYBR Green (Bioline Reagents, London, UK) on a C1000 Touch Thermal Cycler (Biorad). After normalization of gene expression relative to the expression of housekeeping genes *Sdha* and *Tbp*, data were relativized to untreated *IPO13*<sup>+/+</sup>. Gene names in red and blue denote those up- or down-regulated respectively in response to stress in *IPO13*<sup>+/+</sup> ESCs, with the gene name in grey denoting a gene down-regulated in response to stress in both *IPO13*<sup>+/+</sup> and *IPO13*<sup>-/-</sup> ESCs. Results represent the mean  $\pm$  SEM (n = 4, where 2 cDNA samples were measured in duplicate). p values (two tailed student's t test) left to right top to bottom: p = 0.0240, p = 0.7544, p = 0.0070, p = 0.9166, p = 0.0096, p = 0.5994, p = 0.0188, p = 0.6615, p = 0.0046, p = 0.4313, p = 0.0171, p = 0.3593, p = 0.0003, p = 0.4878, p = 0.0309, p = 0.3467, p = 0.0002, p = 0.1306, p < 0.0001, p = 0.3048, p = 0.0015 and p = 0.0266. Source data are provided as a Source Data file.

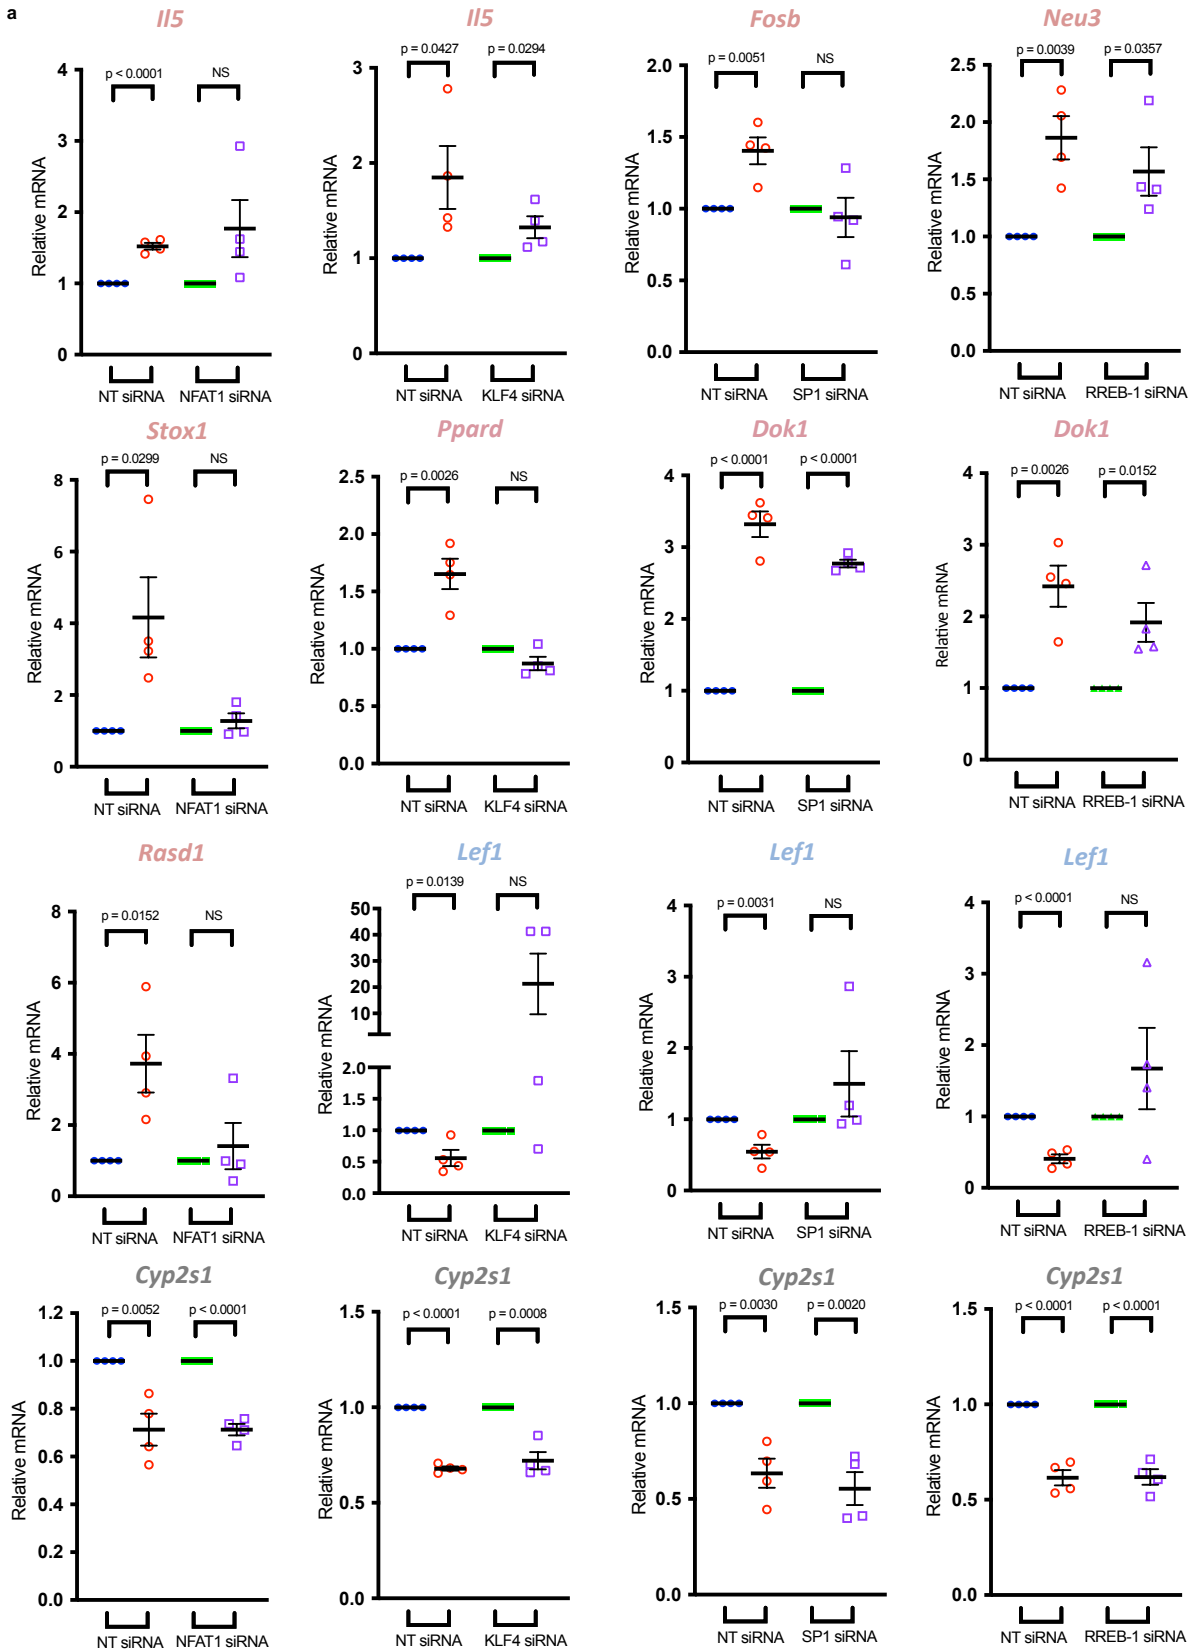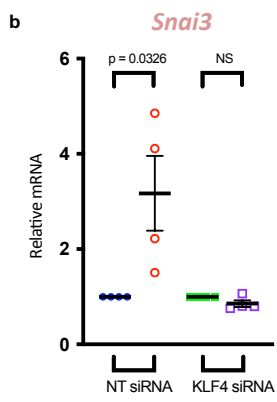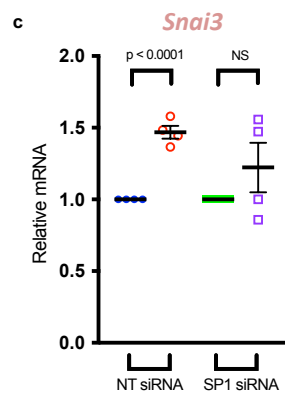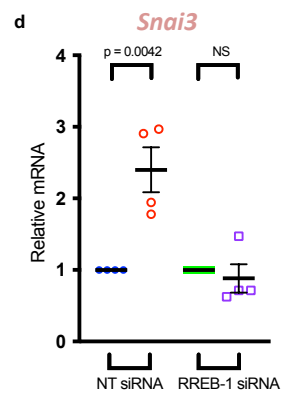

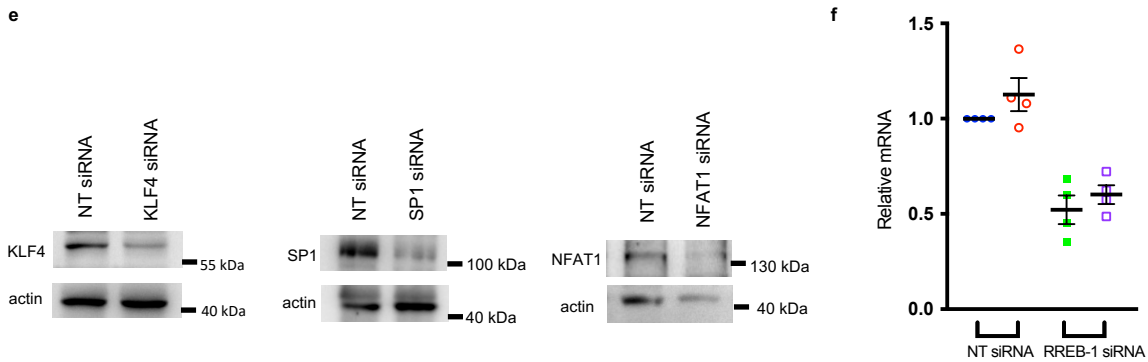

**Supplementary Figure 3. RT-qPCR analysis of expression changes regulated in response to oxidative stress in genes containing TF consensus motifs.** RT-qPCR analysis of genes treated to oxidative stress. IPO13<sup>+/+</sup> ESCs were treated with siRNA targeting **a**. NFAT1, **b**. KLF4, **c**. SP1, **d**. RREB-1 or non-targeting (NT) siRNA. 3 d post transfection, cells were treated with 125  $\mu$ M H<sub>2</sub>O<sub>2</sub> for 1 h followed by a 2 h recovery prior to RNA extraction. Transcript levels were assessed as per Sup. Fig. 2 legend. Gene names in red and blue denote those up- or down-regulated respectively in response to stress in IPO13<sup>+/+</sup> ESCs, with gene name in grey denoting a gene down-regulated in response to stress in both IPO13<sup>+/+</sup> and IPO13<sup>-/-</sup> ESCs as per Supplementary Figure 2. After normalization of gene expression relative to the expression of housekeeping genes *Sdha* and *Tbp*, data were relativized to the respective basal gene expression values for specific/NT siRNA respectively. qPCR data represents the mean  $\pm$  SEM (n = 4, where 2 cDNA samples were measured in duplicate). p values (two tailed student's t test) top to bottom left to right **a**: p < 0.0001, p = 0.1034, p = 0.0299, p = 0.2266, p = 0.0152, p = 0.7788, p = 0.0052 and p < 0.0001, **b**: p = 0.0326, p = 0.0863, p = 0.0427, p = 0.0294, p = 0.0026, p = 0.0709, p = 0.0139, p = 0.1302, p < 0.0001 and p = 0.0008, **c**: p < 0.0001, p = 0.2446, p = 0.0051, p = 0.6788, p < 0.0001, p < 0.0001, p = 0.0031, p = 0.3188, p = 0.0030 and p = 0.0020, **d**: p = 0.0042, p = 0.5770, p = 0.0039, p = 0.0357, p = 0.0026, p = 0.0152, p < 0.0001, p = 0.2816, p < 0.0001 and p < 0.0001. Total cell extracts were probed for knockdown by Western Blotting (**e**) using rabbit-anti-KLF4 (Abcam), rabbit-anti-SP1 (Milipore) or mouse-anti-NFAT1 (Abcam), or mouse-anti-actin (Abcam) for loading control, followed by imaging using the ChemiDoc Gel Imaging System (Biorad). **f**. RT-qPCR repeated as in **d**, measuring RREB-1 transcript levels. Data represents the mean  $\pm$  SEM (n = 4, where 2 cDNA samples were measured in duplicate). Source data are provided as a Source Data file.

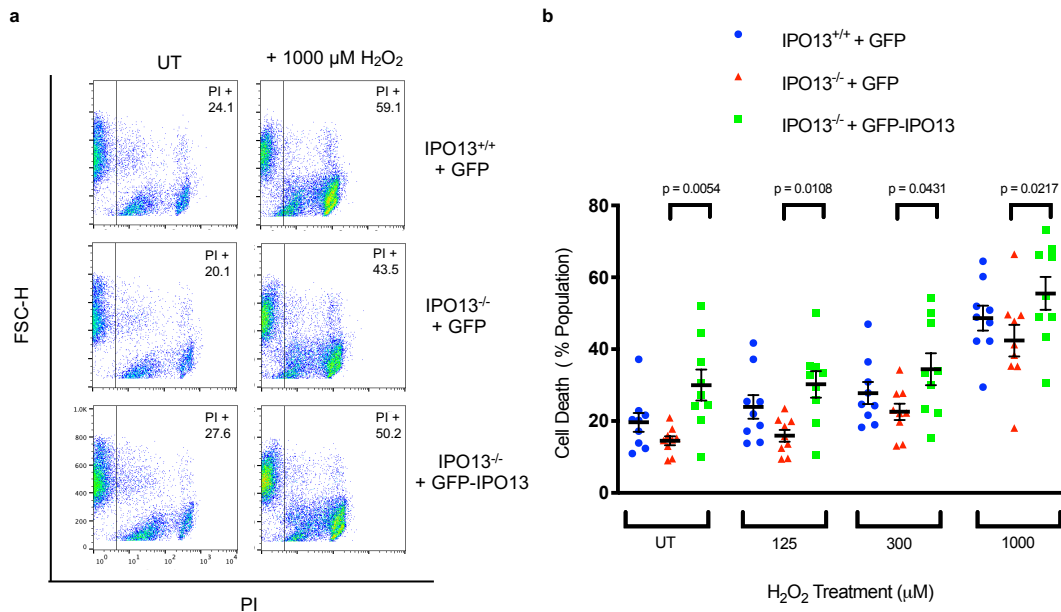

**Supplementary Figure 4. Ectopic expression of IPO13 rescues IPO13<sup>-/-</sup> ESC susceptibility to H<sub>2</sub>O<sub>2</sub>-induced cell death.** IPO13<sup>+/+</sup> ESCs were transfected with GFP and IPO13<sup>-/-</sup> ESCs were transfected with either GFP or GFP-tagged IPO13. ESCs were then treated with H<sub>2</sub>O<sub>2</sub> as indicated for 1 h and stained with PI for flow cytometric analysis. **a.** Representative dot plots of the indicated samples with the percentage of ESC PI positive. **b.** Pooled data (n = 9 independent experiments) for % PI positive cells from the analysis such as that in **a** are shown (mean ± SEM), with p values for comparisons indicated, two-way ANOVA and Tukey's multiple comparisons test (left to right: p = 0.0054, p = 0.0108, p = 0.0431 and p = 0.0217). Source data are provided as a Source Data file.

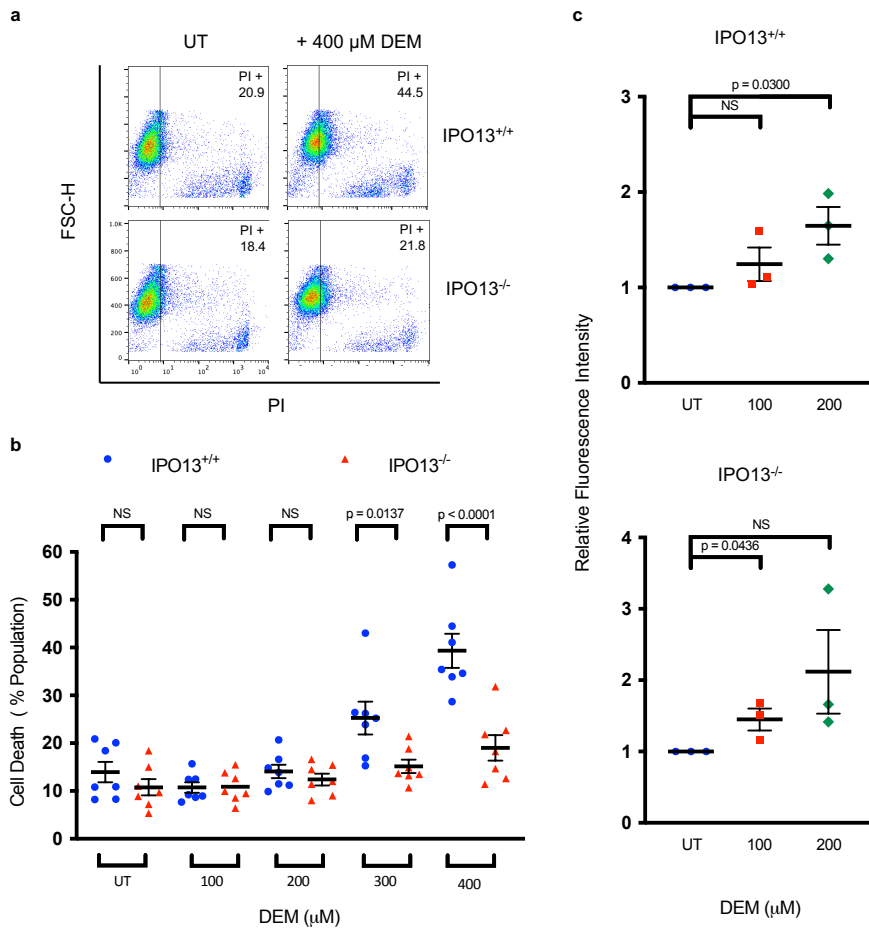

**Supplementary Figure 5. IPO13 contributes to DEM-induced oxidative stress-induced cell death.** IPO13<sup>+/+</sup> and IPO13<sup>-/-</sup> ESCs were treated with DEM as indicated for 24h, and then stained with PI and analysed by flow cytometry. **a.** Representative dot plots of the indicated samples with the percentage of ESC PI positive. **b.** Pooled data (n = 7 independent experiments) for % PI positive cells from the analysis such as that in **a** are shown (mean ± SEM), two-way ANOVA and Tukey's multiple comparisons test. P values from left to right: p = 0.9730, p > 0.9999, p = 0.9998, p = 0.0137 and p < 0.0001. **c.** IPO13<sup>+/+</sup> and IPO13<sup>-/-</sup> ESCs were treated with DEM as indicated for 24 h and then stained immediately with 5 μM CellROX Green for 30 min and analysed by flow cytometry. Quantification of the fluorescence intensity relative to the untreated (UT) sample are shown representing the mean ± SEM (n=3 independent experiments), p values (two tailed student's t test) left to right **b**: p = 0.9730, p > 0.9990, p = 0.9998, p = 0.0137, p < 0.0001 and top to bottom **c**: p = 0.0300, p = 0.2339, p = 0.1287, p = 0.0436. Source data are provided as a Source Data file.

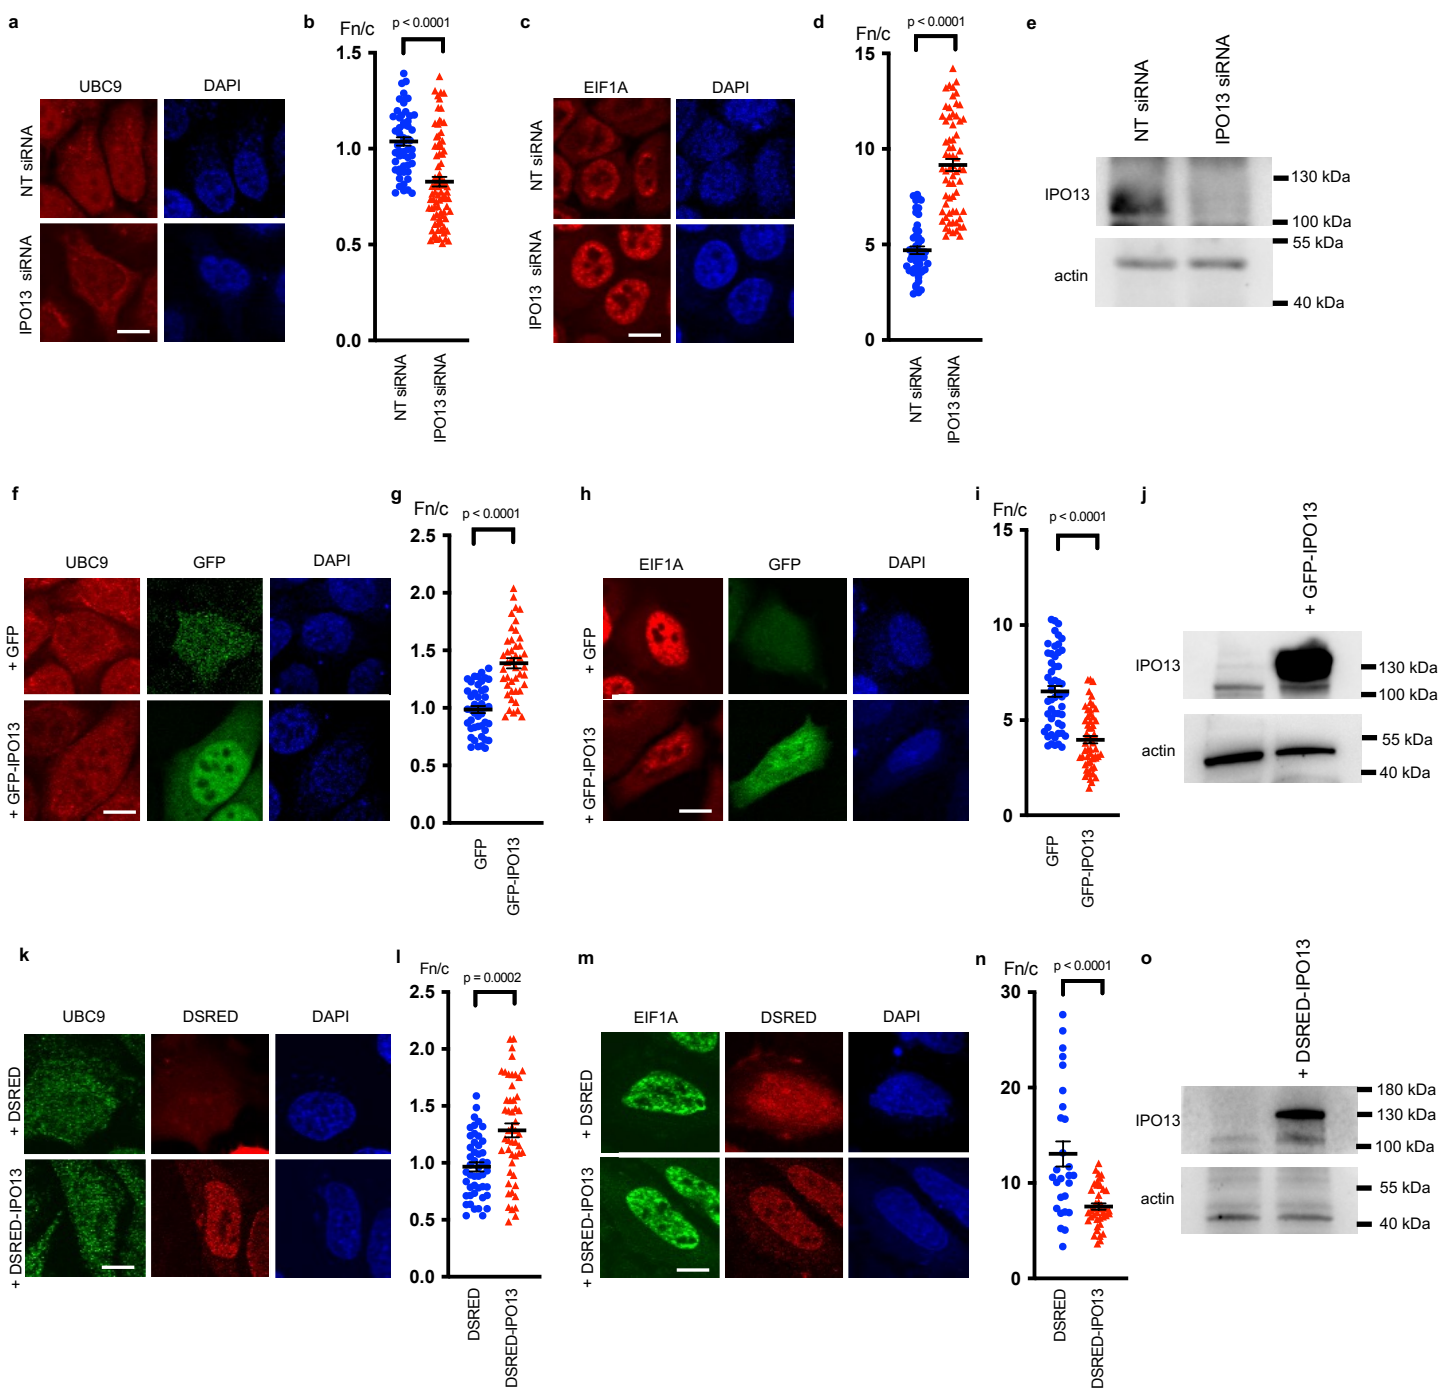

**Supplementary Figure 6. Ectopic expression or knock down of IPO13 affects the localisation of IPO13**

**import and export cargoes.** **a-e.** HeLa cells were transfected with non-targeting (NT) or IPO13 targeting siRNA 72 h prior to processing for CLSM imaging. All cells were counterstained with DAPI to highlight nuclei. **a.** Representative images of cells immunostained with anti-UBC9. Scale bar = 10  $\mu$ m **b.** Quantitative analysis of endogenous UBC9 protein localisation was carried out using the ImageJ software on images such as those in **a**, to determine the nuclear to cytoplasmic ratio (Fn/c). Data represent the mean  $\pm$  SEM of the nuclear (Fn) and cytoplasmic fluorescence (Fc) above background fluorescence for 61 cells (NT) and 81 cells (IPO13 siRNA). p value (two tailed student's t test) :  $p < 0.0001$ . **c.** Representative images of cells immunostained with anti-EIF1A. Scale bar = 10  $\mu$ m **d.** Quantitative analysis of endogenous EIF1A localisation carried out as per **b** for 50 cells (NT) and 66 cells (IPO13 siRNA). p value (two tailed student's t test):  $p < 0.0001$ . **e.** Total cell extracts were probed by Western blotting using rabbit-anti-IPO13 (Protein Tech), with mouse-anti-actin (Abcam) as a control, and imaged using the ChemiDoc Gel Imaging System (Biorad). **f-j.** HeLa cells were transfected to express either GFP or GFP-tagged IPO13 immediately processed for CLSM imaging and/or Western analysis. **f.** Representative images of cells immunostained with anti-UBC9. Scale bar = 10  $\mu$ m **g.** Quantitative analysis of endogenous UBC9 protein localisation performed as per **b**, representative of the mean  $\pm$  SEM for 45 cells (GFP) and 43 cells (GFP-IPO13). p value (two tailed student's t test):  $p < 0.0001$ . **h.** Representative images of cells immunostained with anti-EIF1A. Scale bar = 10  $\mu$ m **i.** Quantitative analysis of



endogenous EIF1A localisation carried out as per **b** for 52 cells (GFP) and 57 cells (GFP-IPO13). p value (two tailed student's t test):  $p < 0.0001$ . **j**. Total cell extracts were probed as in **e**. **k-o**. HeLa cells were transfected to express either DSRED or DSRED-tagged IPO13 immediately processed for CLSM imaging and/or Western analysis. **k**. Representative images of cells immunostained with anti-UBC9. Scale bar = 10  $\mu\text{m}$ . **l**. Quantitative analysis of endogenous UBC9 protein localisation performed as per **b**, representative of the mean  $\pm$  SEM for 47 cells (DSRED) and 50 cells (DSRED-IPO13). p value (two tailed student's t test):  $p = 0.0002$ . **m**. Representative images of cells immunostained with anti-EIF1A. Scale bar = 10  $\mu\text{m}$ . **n**. Quantitative analysis of endogenous EIF1A localisation carried out as per **b**, representative of the mean  $\pm$  SEM for 27 cells (DSRED) and 40 cells (DSRED-IPO13). p value (two tailed student's t test):  $p < 0.0001$ . **o**. Total cell extracts were probed as in **e**. Source data are provided as a Source Data file.

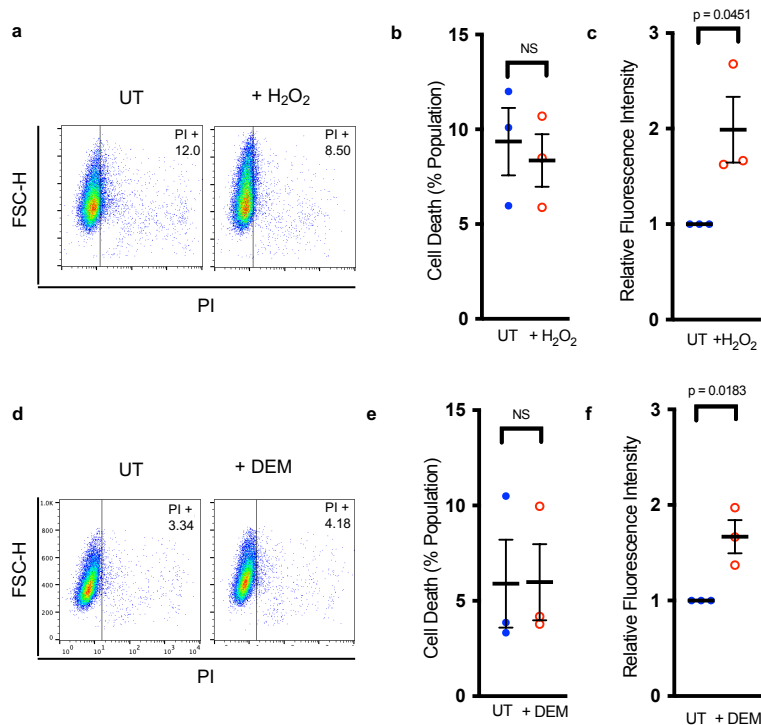

**Supplementary Figure 7. Sublethal concentration of hydrogen peroxide and DEM utilised in localisation and interaction studies do not induce cell death in HeLa cells.** **a-b.** HeLa cells were treated with 125  $\mu\text{M}$  H<sub>2</sub>O<sub>2</sub> for 1 h and then stained immediately with propidium iodide for flow cytometric analysis of cell death. **a.** Representative dot plots of the indicated samples with the percentage of HeLa PI positive. **b.** Pooled data (n=3 independent experiments) for % PI positive HeLa cells from the analysis such as that in **a** are shown (mean  $\pm$  SEM). **c.** HeLa cells were treated with 125  $\mu\text{M}$  H<sub>2</sub>O<sub>2</sub> for 1 h prior to staining with 10  $\mu\text{M}$  CellRox Green for 30 min and analysed by flow cytometry. Quantification of the fluorescence intensity relative to the untreated (UT) sample are shown representing the mean  $\pm$  SEM (n=3 independent experiments). **d-e.** HeLa cells were treated with 100  $\mu\text{M}$  DEM for 24 h and then stained immediately with propidium iodide for flow cytometric analysis of cell death. **d.** Representative dot plots of the indicated samples with the percentage of HeLa PI positive. **e.** Pooled data (n=3 independent experiments) for % PI positive HeLa cells from the analysis such as that in **d** are shown (mean  $\pm$  SEM). **f.** HeLa cells were treated with 100  $\mu\text{M}$  DEM for 24 h prior to staining and flow cytometry as in **c**. Quantification of the fluorescence intensity relative to the UT sample are shown representing the mean  $\pm$  SEM (n=3 independent experiments). p values (two tailed student's t test) left to right top to bottom p = 0.6820, p = 0.0451, p = 0.9811, p = 0.0183. Source data are provided as a Source Data file.

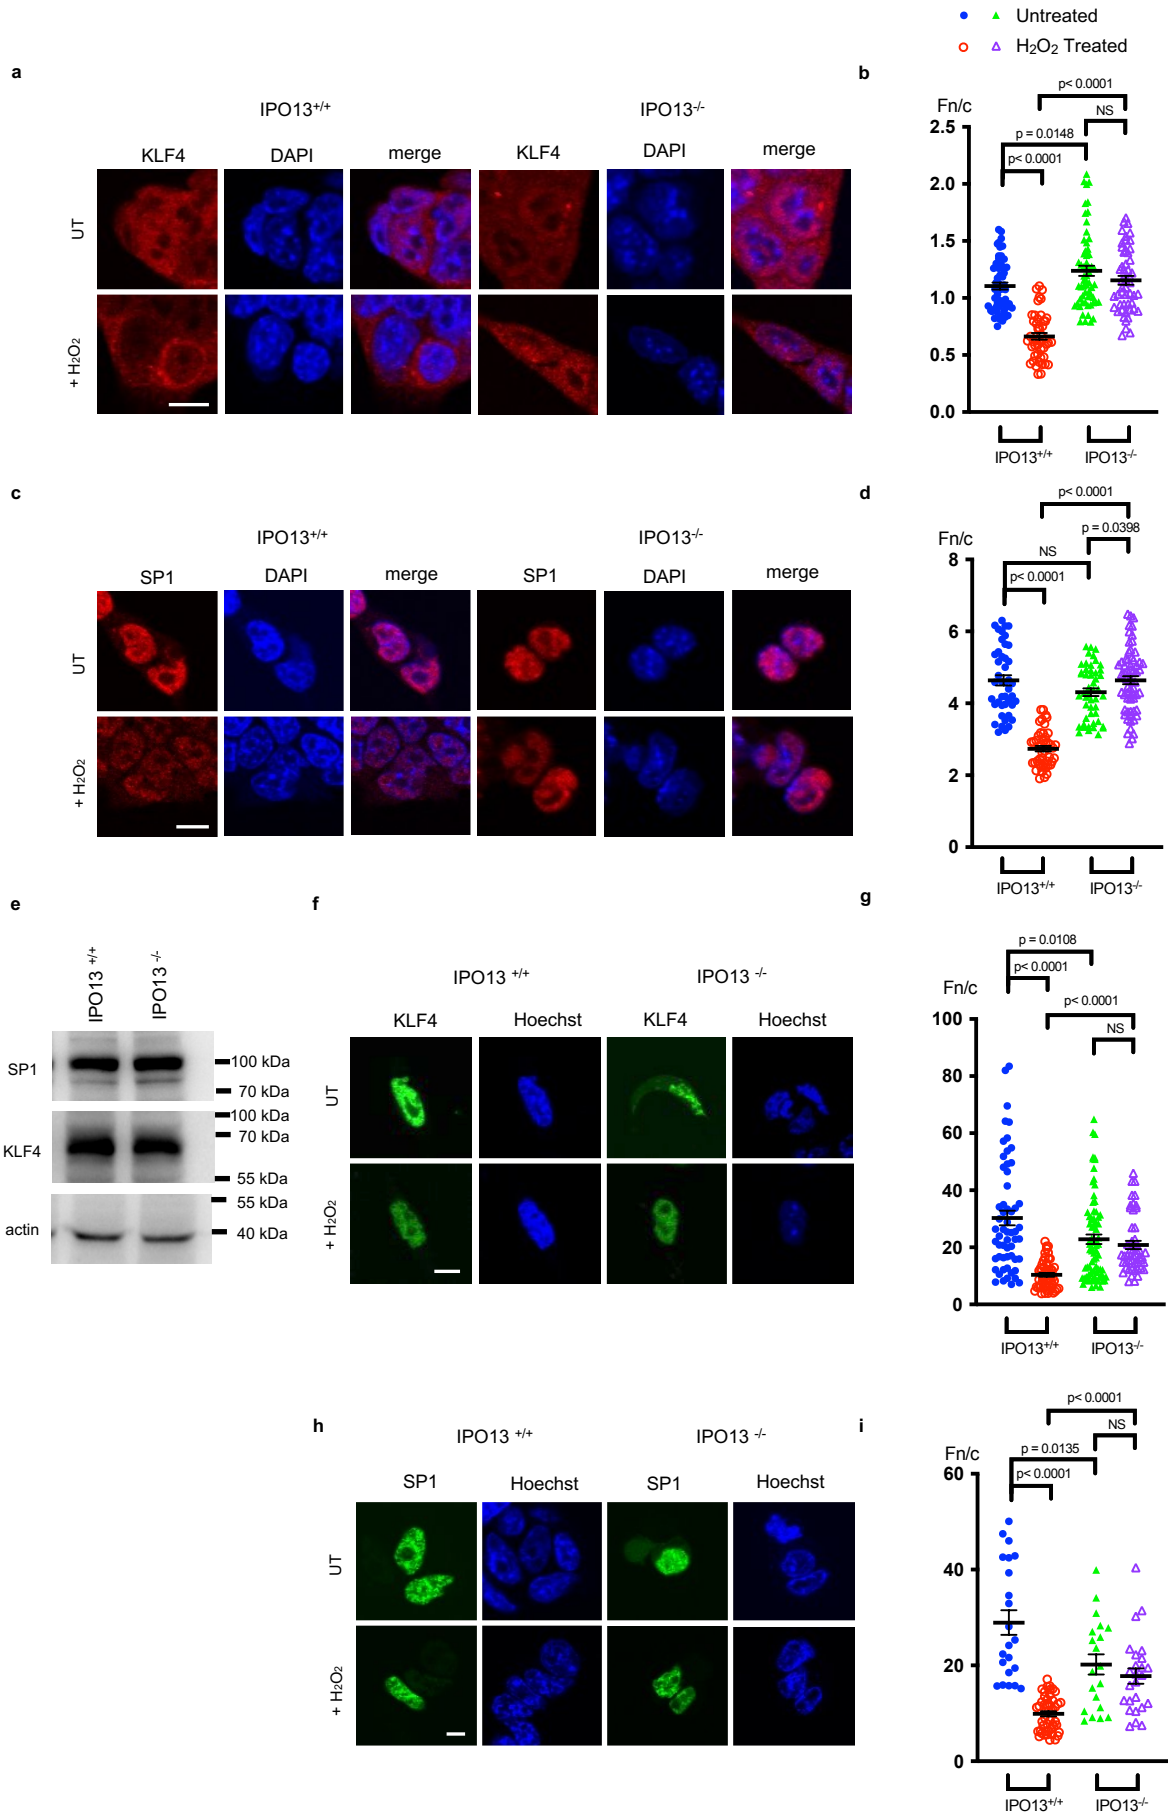

**Supplementary Figure 8. IPO13 can mediate nuclear export of KLF4 and SP1 in response to H<sub>2</sub>O<sub>2</sub> induced oxidative stress in ESCs. a-d.** IPO13<sup>+/+</sup> and IPO13<sup>-/-</sup> cells were treated with 125 μM H<sub>2</sub>O<sub>2</sub> for 1 h prior to processing for CLSM imaging. All cells were counterstained with DAPI to highlight nuclei. **a.** Representative images of ESCs immunostained with anti-KLF4. Scale bar = 10 μm **b.** Quantitative analysis of endogenous KLF4 protein localisation was carried out using the ImageJ software on images such as those in **a**, to determine the nuclear to cytoplasmic ratio (Fn/c). Data represent the mean ± SEM of the nuclear (Fn)

and cytoplasmic fluorescence (Fc) above background fluorescence of 56 cells (IPO13<sup>+/+</sup> Untreated (UT)), 47 cells (IPO13<sup>+/+</sup> + H<sub>2</sub>O<sub>2</sub>), 60 cells (IPO13<sup>-/-</sup> UT), 51 cells (IPO13<sup>-/-</sup> + H<sub>2</sub>O<sub>2</sub>). p values (two tailed student's t test) top to bottom: p < 0.0001, p = 0.1612, p = 0.0148 and p < 0.0001. **c.** Representative images of cells immunostained with anti-SP1. Scale bar = 10 μm **d.** Quantitative analysis of endogenous SP1 localisation carried out as per **b**. Data represent the mean ± SEM for 44 cells (IPO13<sup>+/+</sup> UT), 46 cells (IPO13<sup>+/+</sup> + H<sub>2</sub>O<sub>2</sub>), 49 cells (IPO13<sup>-/-</sup> UT), 63 cells (IPO13<sup>-/-</sup> + H<sub>2</sub>O<sub>2</sub>). p values (two tailed student's t test) top to bottom: p < 0.0001, p = 0.0398, p = 0.0632 and p < 0.0001. **e.** Total IPO13<sup>+/+</sup> and IPO13<sup>-/-</sup> ESC extracts were probed by Western blotting using rabbit-anti-SP1 (Milipore) or rabbit-anti-KLF4 (Abcam), with mouse-anti-actin (Abcam) as a control, and imaged using the ChemiDoc Gel Imaging System (Biorad), data representing n = 2 experiments **f-i.** IPO13<sup>+/+</sup> and IPO13<sup>-/-</sup> cells were transfected to express either GFP-tagged KLF4 (**f,g**) or GFP-tagged SP1 (**h,i**) and treated with 125 μM H<sub>2</sub>O<sub>2</sub> for 1 h prior to CLSM imaging and counterstained with Hoechst. **f.** Representative images of cells ectopically expressing GFP-KLF4. Scale bar = 10 μm **g.** Quantitative analysis of ectopic KLF4 protein localisation performed as per **b**, representative of the mean ± SEM from 2 separate experiments of 58 cells (IPO13<sup>+/+</sup> UT), 54 cells (IPO13<sup>+/+</sup> + H<sub>2</sub>O<sub>2</sub>), 80 cells (IPO13<sup>-/-</sup> UT), 49 cells (IPO13<sup>-/-</sup> + H<sub>2</sub>O<sub>2</sub>). p values (two tailed student's t test) top to bottom: p = 0.0108, p < 0.0001, p < 0.0001 and p = 0.4051. **h.** Representative images of cells ectopically expressing GFP-SP1. Scale bar = 10 μm **i.** Quantitative analysis of ectopic SP1 protein localisation performed as per **b**, representative of the mean ± SEM of 33 cells (IPO13<sup>+/+</sup> UT), 33 cells (IPO13<sup>+/+</sup> + H<sub>2</sub>O<sub>2</sub>), 43 cells (IPO13<sup>-/-</sup> UT), 50 cells (IPO13<sup>-/-</sup> + H<sub>2</sub>O<sub>2</sub>). p values (two tailed student's t test) top to bottom: p < 0.0001, p = 0.3606, p = 0.0135 and p < 0.0001. Source data are provided as a Source Data file.

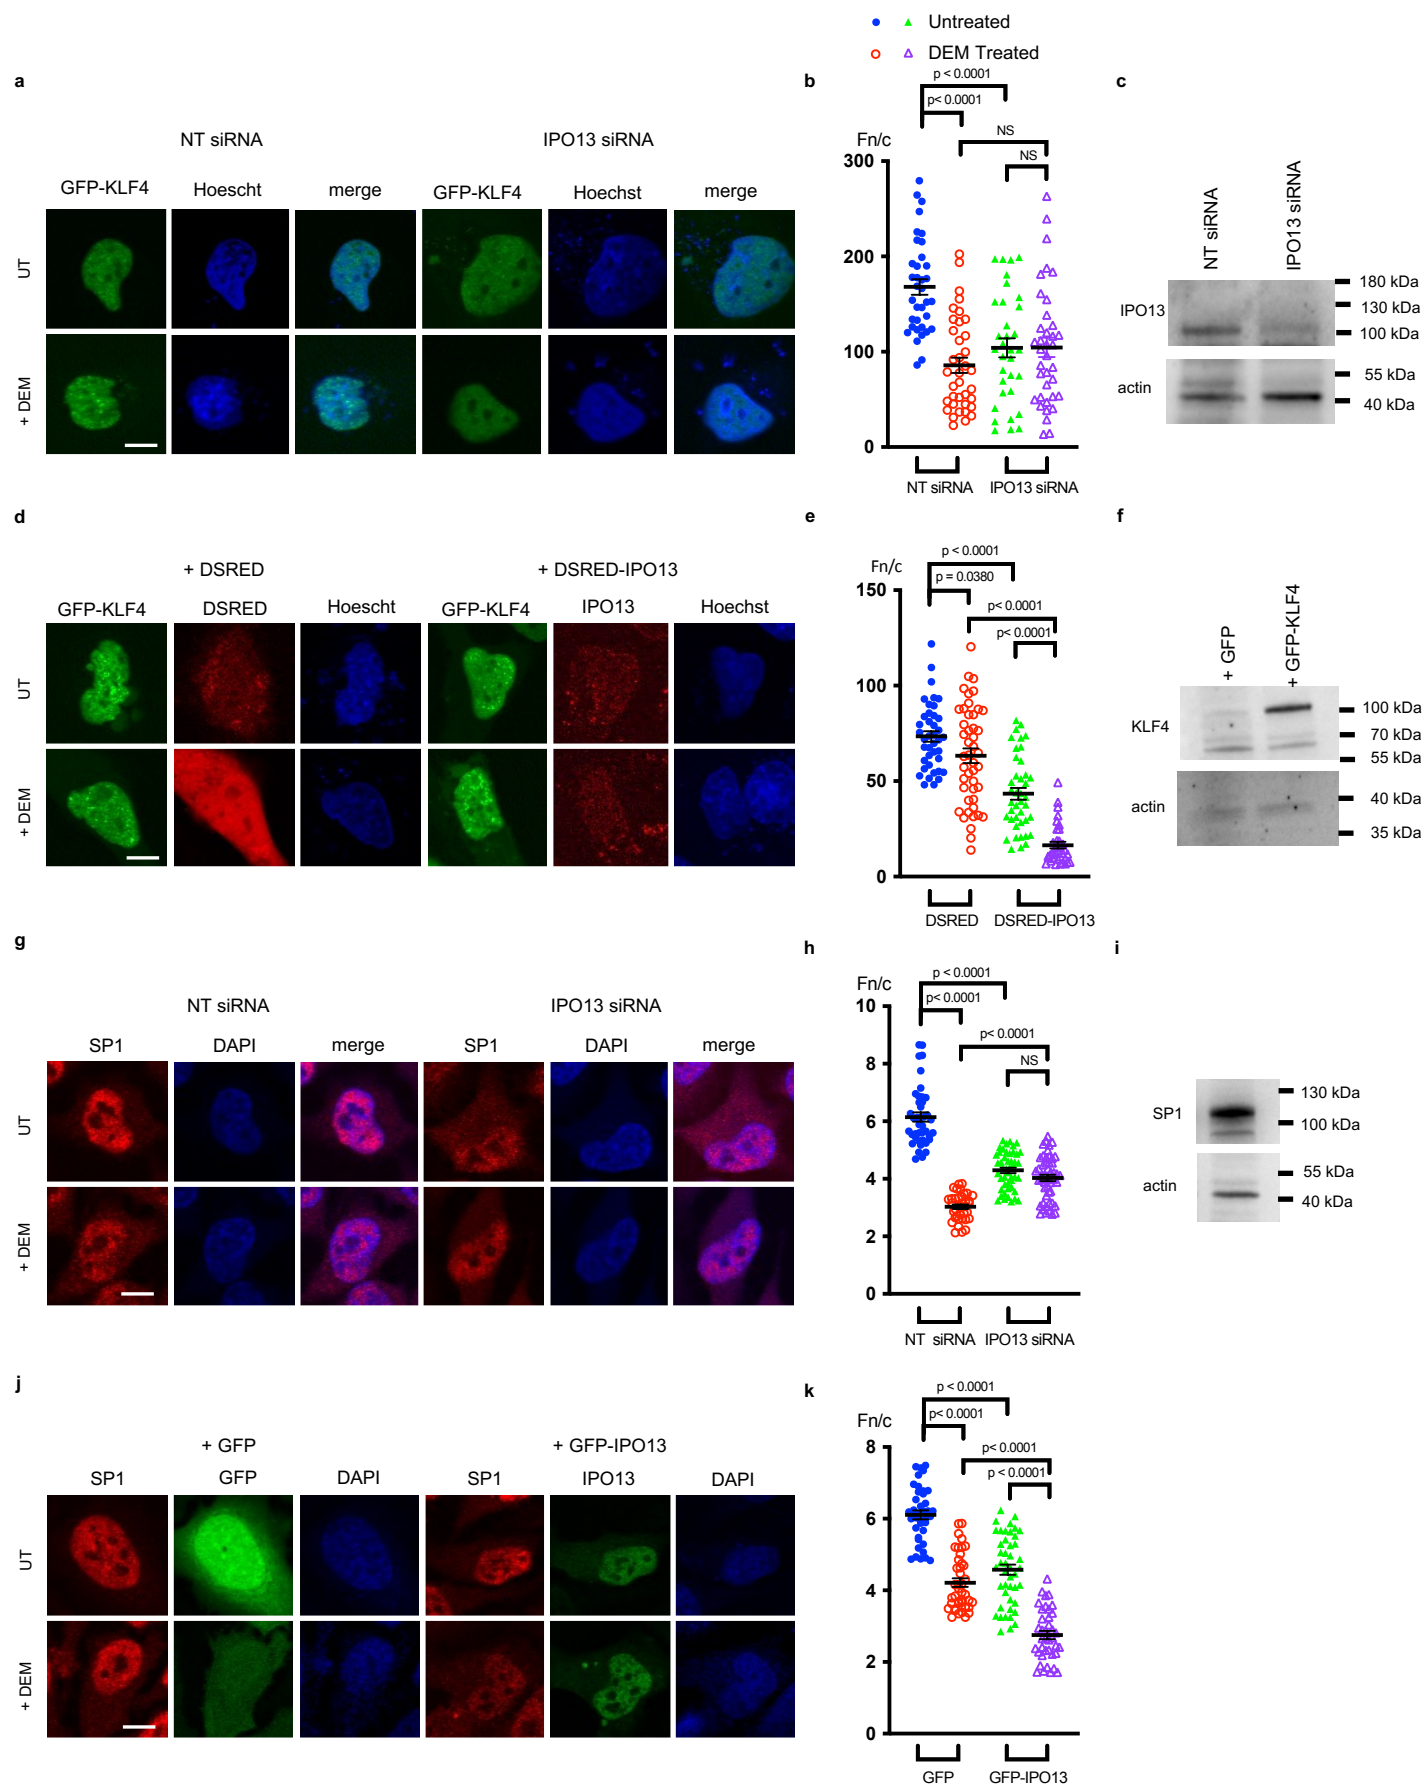

**Supplementary Figure 9. IPO13 can mediate nuclear export of KLF4 and SP1 in response to DEM-induced oxidative stress.** **a-c.** HeLa cells were transfected with non-targeting (NT) or IPO13 targeting siRNA 72 h prior to treatment with 100  $\mu$ M DEM for 24 h. Cells were transfected to express GFP-KLF4 and processed for CLSM imaging and/or Western analysis. Cells were stained with Hoechst to highlight nuclei. **a.** Representative images of cells transfected to express GFP-KLF4. Scale bar = 10  $\mu$ m **b.** Quantitative analysis of ectopic KLF4 protein localisation was carried out using the ImageJ software on images such as those in **a**, to determine the nuclear to cytoplasmic ratio (Fn/c). Data represent the mean  $\pm$  SEM from 2

separate experiments, where each experiment involved analysis of the nuclear (Fn) and cytoplasmic fluorescence (Fc) above background fluorescence. 36 cells (NT Untreated (UT)), 37 cells (NT + H<sub>2</sub>O<sub>2</sub>), 33 cells (IPO13 siRNA UT), 37 cells (IPO13 siRNA + H<sub>2</sub>O<sub>2</sub>) were analysed. p values (two tailed student's t test) top to bottom: p < 0.0001, p < 0.0001, p = 0.1508 and p = 0.9813. **c.** Total cell extracts were subjected to Western analysis using rabbit-anti-IPO13 (Protein Tech), with mouse-anti-actin (Abcam) as a control, and imaged using the ChemiDoc Gel Imaging System (Biorad). **d-e.** HeLa cells were treated with 100 μM DEM for 24 h and co-transfected to express either DSRED or DSRED-tagged IPO13 with GFP-KLF4 and nuclei stained with Hoechst prior to CLSM imaging. **d.** Representative images of cells co-expressing DSRED or DSRED-IPO13 with GFP-KLF4. Scale bar = 10 μm **e.** Quantitative analysis of ectopic KLF4 protein localisation performed as per **c.**, representative of the mean ± SEM of 40 cells (DSRED UT), 46 cells (DSRED + H<sub>2</sub>O<sub>2</sub>), 41 cells (DSRED-IPO13 UT) and 35 cells (DSRED-IPO13 + H<sub>2</sub>O<sub>2</sub>). p values (two tailed student's t test) top to bottom: p < 0.0001, p = 0.0380, p < 0.0001 and p < 0.0001. **f.** Total cell extracts from HeLa transfected with GFP or GFP-KLF4 were probed as in **c.**, with rabbit-anti-KLF4 (Abcam) and mouse-anti-actin (Abcam) as a control, representing n = 1 experiment. **g-i.** HeLa cells were transfected with siRNA as in **a-c.** prior to treatment with 100 μM DEM for 24 h. Cells immediately processed for CLSM imaging and/or Western analysis. Cells were counterstained with DAPI. **g.** Representative images of cells immunostained with anti-SP1 (Millipore). Scale bar = 10 μm **h.** Quantitative analysis of endogenous SP1 localisation carried out as per **b.** representing the mean ± SEM of 41 cells (NT UT), 36 cells (NT + H<sub>2</sub>O<sub>2</sub>), 47 cells (IPO13 siRNA UT), 49 cells (IPO13 siRNA + H<sub>2</sub>O<sub>2</sub>). p values (two tailed student's t test) top to bottom: p < 0.0001, p < 0.0001, p < 0.0001 and p = 0.0666. **i.** Total cell extracts were probed by Western blotting as in **c.** using anti-SP1 (Millipore) and mouse-anti-actin (Abcam) as a control. **j-k.** HeLa cells were treated with 100 μM DEM for 24 h and co-transfected to express either GFP or GFP-tagged IPO13 prior to being processed for CLSM imaging. Cells are counterstained with DAPI. **j.** Representative images of cells immunostained with anti-SP1. Scale bar = 10 μm **k.** Quantitative analysis of endogenous SP1 localisation carried out as in **c.** with data representative of the mean ± SEM of 39 cells (GFP UT), 41 cells (GFP + DEM), 45 cells (GFP-IPO13 UT), 39 cells (GFP-IPO13 + DEM). p values (two tailed student's t test) top to bottom: p < 0.0001, p < 0.0001, p < 0.0001 and p < 0.0001. Source data are provided as a Source Data file.

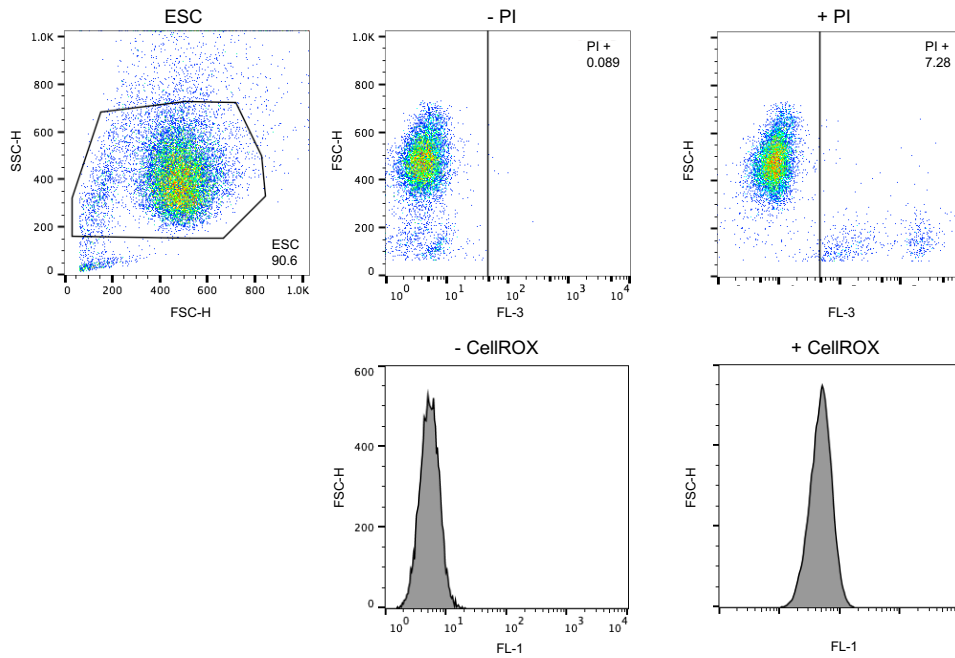

**Supplementary Figure 10. Gating strategy to identify cell death and reactive oxygen species in mouse embryonic stem cells.** IPO13<sup>+/+</sup> and IPO13<sup>-/-</sup> mouse embryonic stem cells were gated to remove debris (FSC/SSC) and unstained cells were used to gate for PI (propidium iodide) positive cells or CellROX positive cells.

**Supplementary Table 1. Oligonucleotides used for qPCR Analysis**

| <b>Primer Name</b> | <b>Forward Sequence</b>        | <b>Reverse Sequence</b>    |
|--------------------|--------------------------------|----------------------------|
| Cyp2s1             | TGGCACAGGAGAAACAAGAC           | ACATACCTGCTGTTTGCTGG       |
| Ddit3              | CATCCCCAGGAAACGAAGAG           | TCTTCCTCCTGGGCCATAGA       |
| Dnajb5             | ACGCCGAGGAGAAGTTTAAG           | GAGGCCTTCCTCACCATACT       |
| Dok1               | GAGGCTTCTGAACGCTGCGGCTTGC      | AGAACATTACCTTGTCCTCCGCCAT  |
| Fosb               | CCGAGAAGAGACACTTACCC           | CTCTTCAAGCTGATCAGTTTCC     |
| Grxcr2             | CCATAAGCCTCCACCCATTA           | CCCTGTCTCCATCATTCTCC       |
| Hspa1a             | ATGGACAAGGCGCAGATCC            | CTCCGACTTGTCCTCCAT         |
| Ii5                | TTGACAAGCAATGAGACGATGAG        | ACCAGTTTGAGGCCAGCCTGCG     |
| Lef1               | GAGCACTTTTCTCCGGGATC           | GGGATTTTCAGGAGCTGGAG       |
| Map3k14            | AGAAGACCGAGCCCTTTACTACCT       | ACAGGAGCACGTTGTCAGCTTTGA   |
| Neu3               | CTTCAGGCCTTCTTCCGAGA           | GAGTAGGGTGGGACTTCCTC       |
| Ppard              | TCCATCGTCAACAAAGACGGG          | ACTTGGGCTCAATGATGTCAC      |
| Rasd1              | CCACACAACCTGAGGACCTT           | TTCACAGCAGGTGACTGTCC       |
| Rnu12              | AACTTATGAGTAAGGAAAATAACGATTCCG | AATTTTTGAGCGGGTATAGG       |
| Rreb1              | CACCACAGATACCAACAAGTTCAGTCC    | CTTCTCAGGGAGCAGGTGGTAACTCC |
| Sdha               | GCTCCTGCCTCTGTGGTTGA           | AGCAACACCGATGAGCCTG        |
| Snai3              | TGCCGCGCTCCTTCCTGGTG           | CAGAGGTA CTGTCCCAAGGC      |
| Stox1              | AACACCTTGAAGGGACAGAGAA         | ATCCAAAATGGCGGAATTAGTA     |
| Tbp                | GAAGAACAATCCAGACTAGCAGCA       | CCTTATAGGGA ACTTCACATCACAG |
