# Supplementary material for: Nuclear transporter Importin-13 plays a key role in the oxidative stress transcriptional response
Source: PubMed Central journal article supplement (PMC8501021; doi:10.1038/s41467-021-26125-x), 2021-10-08
Supplement: 41467_2021_26125_MOESM3_ESM.pdf [file 41467_2021_26125_MOESM3_ESM.pdf]

### **Description of Additional Supplementary Files**

Supplementary Data 1: DEGs for KO NS relative to WT NS (IPO13<sup>-/-</sup> relative to IPO13<sup>+/+</sup>)

Supplementary Data 2: DEGs for WT ST relative to WT NS (IPO13<sup>+/+</sup> + H2O2 relative to IPO13<sup>+/+</sup> NS)

Supplementary Data 3: DEGs for KO ST relative to KO NS (IPO13<sup>-/-</sup> + H2O2 relative to IPO13<sup>-/-</sup> NS)
